# Supplementary material for: Protective Effect of the Aqueous Extract of Deschampsia antarctica (EDAFENCE®) on Skin Cells against Blue Light Emitted from Digital Devices
Source: PubMed Central journal article supplement (PMC7038134; doi:10.3390/ijms21030988), 2020-02-02
Supplement: ijms-21-00988-s001.pdf [file ijms-21-00988-s001.pdf]

(A)

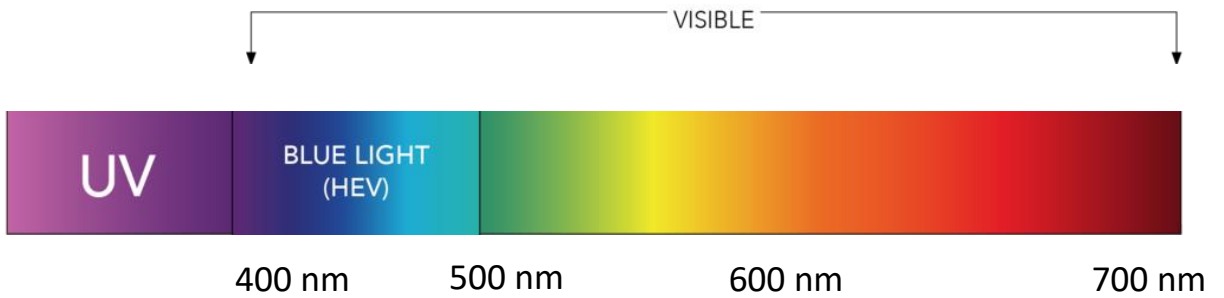

(B)

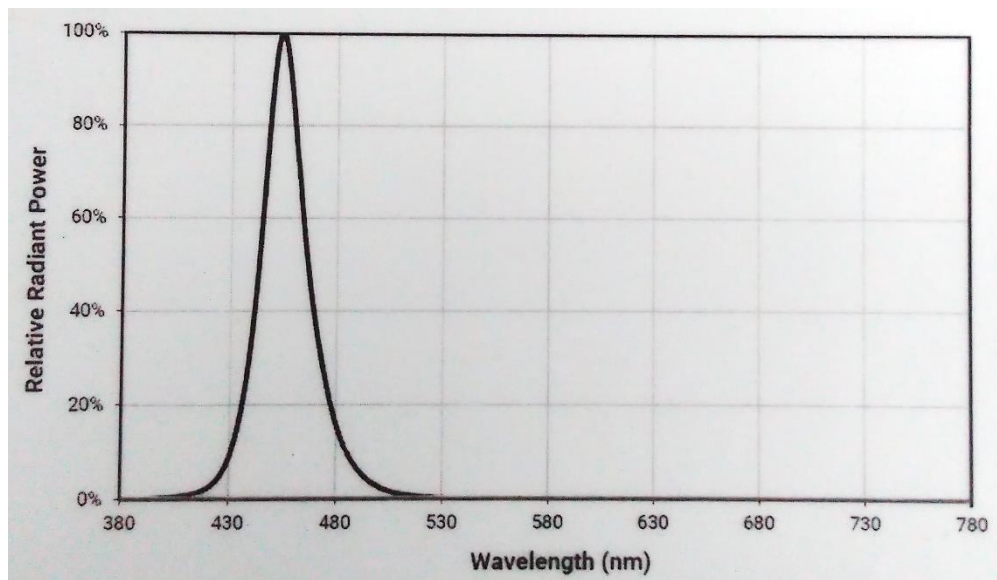

**Supplementary Figure 1: (A) Visible light emission wavelengths and classification.** Image adapted from Blue Light Exposed, 2018. **(B) Spectrum of blue light source.**
